# Supplementary material for: Guideline‐Recommended Time Less Than 90 Minutes From ECG to Primary Percutaneous Coronary Intervention for ST‐Segment–Elevation Myocardial Infarction Is Associated with Major Survival Benefits, Especially in Octogenarians: A Contemporary Report in 11 226 Patients from NORIC
Source: PubMed Central journal article supplement — J Am Heart Assoc. 2022 Sep 3;11(17):e024849. doi: 10.1161/JAHA.122.024849 (PMC9496403; doi:10.1161/jaha.122.024849), 2022-09-03
Supplement: JAH3-11-e024849-s001.pdf [file JAH3-11-e024849-s001.pdf]

# **SUPPLEMENTAL MATERIAL**

**Table S1. 30 day mortality according to ECG2sheath time over/under 90 minutes and age group.**

| <b>Whole group</b>     |              |             |              |                   |
|------------------------|--------------|-------------|--------------|-------------------|
| <i>ECG2Sheath time</i> | <i>Alive</i> | <i>Dead</i> | <i>Total</i> | <i>Percentage</i> |
| <90 min                | 4017         | 173         | 4190         | 4.1 %             |
| 90 min+                | 2351         | 170         | 2521         | 6.7 %             |
| <i>Total</i>           | 6368         | 343         |              |                   |
| <b>Age &lt;80yo</b>    |              |             |              |                   |
| <i>ECG2Sheath time</i> | <i>Alive</i> | <i>Dead</i> | <i>Total</i> |                   |
| <90 min                | 2057         | 30          | 2087         | 1.4 %             |
| 90 min+                | 3598         | 123         | 3721         | 3.3 %             |
| <i>Total</i>           | 5655         | 153         |              |                   |
| <b>Age &gt;80yo</b>    |              |             |              |                   |
| <i>ECG2Sheath time</i> | <i>Alive</i> | <i>Dead</i> | <i>Total</i> |                   |
| <90 min                | 294          | 64          | 358          | 17.9 %            |
| 90 min+                | 419          | 50          | 469          | 10.7 %            |
| <i>Total</i>           | 713          | 114         |              |                   |

*2x2 table showing survival at 30 days for all patients, and divided by age over/under 80 years according to ECG2sheath insertion time over/under 90 minutes.*

**Table S2. Regularized Cox PH model using LASSO for variable selection (n = 4 919 patients).**

| <b>Model 1 including ECG2Sheath time* (AIC 5844.77)</b>     | <b>Hazard ratio (95% CI)</b> | <b>p-value</b> |
|-------------------------------------------------------------|------------------------------|----------------|
| Age continuous (per 10 years)                               | 2.16 (1.96 - 2.38)           | <0.0001        |
| Sex (male)                                                  | 0.81 (0.65 - 1.00)           | 0.05           |
| Diabetes mellitus                                           | 1.53 (1.17 - 1.98)           | 0.002          |
| Peripheral artery disease                                   | 1.65 (1.19 - 2.28)           | 0.003          |
| Cardiogenic shock at admittance                             | 3.88 (2.79 - 5.38)           | <0.0001        |
| Cardiac arrest                                              | 2.72 (1.87 - 3.96)           | <0.0001        |
| No history of reduced LVEF                                  | 0.56 (0.42 - 0.76)           | 0.0001         |
| Fluro time (per minute)                                     | 1.002 (0.993 - 1.011)        | 0.64           |
| MCS use (any device)                                        | 1.73 (1.09 - 2.73)           | 0.02           |
| Radial access                                               | 0.55 (0.43 - 0.71)           | <0.0001        |
| In-lab complications (any)                                  | 2.78 (1.83 - 4.23)           | <0.0001        |
| Complete revascularization at index procedure               | 0.91 (0.74 - 1.12)           | 0.36           |
| Ecg2sheath time (per 10 min)                                | 1.007 (1.001 - 1.013)        | 0.03           |
| <b>Model 2 excluding ECG2Sheath time † (AIC 5846.474 ‡)</b> |                              |                |
| Age continuous (per 10 years)                               | 2.16 (1.95 - 2.38)           | <0.0001        |
| Sex (male)                                                  | 0.80 (0.65 - 1.00)           | 0.05           |
| Diabetes mellitus                                           | 1.53 (1.18 - 1.99)           | 0.001          |
| Peripheral artery disease                                   | 1.69 (1.22 - 2.33)           | 0.002          |
| Cardiogenic shock at admittance                             | 3.97 (2.86 - 5.50)           | <0.0001        |
| Cardiac arrest                                              | 2.69 (1.85 - 3.92)           | <0.0001        |
| No history of reduced LVEF                                  | 0.56 (0.42 - 0.75)           | <0.0001        |
| Fluoro time (per minute)                                    | 1.002 (0.993 - 1.011)        | 0.64           |
| MCS use (any device)                                        | 1.71 (1.09 - 2.70)           | 0.02           |
| Radial access                                               | 0.56 (0.43 - 0.72)           | <0.0001        |
| In-lab complications (any)                                  | 2.77 (1.82 - 4.21)           | <0.0001        |
| Complete revascularization at index procedure               | 0.90 (0.73 - 1.11)           | 0.35           |

Analyses using the Cox Proportional Hazards model estimating hazard ratio and associated 95% confidence interval. Variable selection and regularization using LASSO with penalized maximum likelihood. Input variables was patient age, sex, smoking, diabetes, hypertension, peripheral artery disease, history of prior revascularization, cardiogenic shock, cardiac arrest, contrast use, fluoro time, admittance outside of office hours (1600-0800h), use of intracoronary imaging, history of heart failure, no. of disease coronary vessels, use of mechanical circulatory support, arterial access site, ECG2sheath time, in-lab complications and complete revascularization at index procedure (n = 20). The method needs complete data and due to row wise deletion, the number of patients was reduced to 4919. LASSO, least absolute shrinkage and selection operator; ECG, electrocardiogram; AIC, Akaike information criterion; LVEF, left ventricular ejection fraction; MCS, mechanical circulatory support.

\*Model using all 20 variables as input.

†Model using all variables except ECG2sheath time.

‡AIC of model 2 is higher indicating poorer model fit.

**Table S3. Missing observations according to variables (total n = 11 226).**

| <b>Time points</b>    | <b>Median (IQR)</b> | <b>Present - no. (%)</b> | <b>Missing - no. (%)</b> |
|-----------------------|---------------------|--------------------------|--------------------------|
| Onset of symptoms     | NA                  | 9730 (86.7)              | 1496 (13.3)              |
| ECG                   | NA                  | 8320 (74.1)              | 2906 (25.9)              |
| Admittance            | NA                  | 10567 (94.1)             | 659 (5.9)                |
| Sheath insertion      | NA                  | 8842 (78.8)              | 2384 (21.2)              |
| Flow                  | NA                  | 7401 (65.9)              | 3825 (34.1)              |
| <b>Time intervals</b> |                     |                          |                          |
| Symptoms2ECG          | 90 (149) minutes    | 7413 (66.0)              | 3813 (34.0)              |
| Symptoms2flow         | 187 (179) minutes   | 6348 (56.5)              | 4878 (43.5)              |
| ECG2sheath            | 75 (53) minutes     | 6832 (60.9)              | 4394 (39.1)              |
| ECG2flow              | 87 (55) minutes     | 5527 (49.2)              | 5699 (50.8)              |
| Door2flow             | 27 (23) minutes     | 6746 (60.1)              | 4480 (39.9)              |
| Sheath2flow           | 11 (8) minutes      | 5231 (46.6)              | 5995 (53.4)              |

Data completeness regarding logistical time points and subsequently derived intervals as well as median and interquartile range values for the latter. NA, not applicable; ECG, electrocardiogram.

**Table S4. Door-to-flow time and mortality.**

| <b>Cox Proportional Hazard Ratio</b>            | <b>Whole population (n = 6,737)</b> |                |
|-------------------------------------------------|-------------------------------------|----------------|
|                                                 | <i>Hazard ratio (95% CI)</i>        | <i>p-value</i> |
| HR per 10 min increase in door2flow time (min)* | 1.034 (1.017 - 1.052)               | <0.0001        |
| HR per quartile of door2flow time (min)*        | 1.22 (1.15 - 1.29)                  | <0.0001        |
|                                                 | <b>&lt;80 y.o. age (n = 6,015)</b>  |                |
|                                                 | <i>Hazard ratio (95% CI)</i>        | <i>p-value</i> |
| HR per 10 min increase in door2flow time (min)* | 1.039 (1.018 - 1.061)               | <0.0001        |
| HR per quartile of door2flow time (min)*        | 1.22 (1.13 - 1.31)                  | <0.0001        |
|                                                 | <b>Age ≥ 80 y.o. age (n = 722)</b>  |                |
|                                                 | <i>Hazard ratio (95% CI)</i>        | <i>p-value</i> |
| HR per 10 min increase in door2flow time (min)* | 1.002 (0.971 - 1.033)               | 0.92           |
| HR per quartile of door2flow time (min)*        | 1.08 (0.97 - 1.20)                  | 0.16           |

\*Sex-adjusted hazard ratio estimates.
